# Supplementary material
Source: MDPI journal article supplement (https://www.mdpi.com/1424-8247/15/10/1266)
Supplement: s1 [file s1]

## **Supplementary Material (SM)**

# ***In Vitro* Cytotoxicity Evaluation of Plastoquinone Analogues against Colorectal and Breast Cancers along with *In Silico* Insights**

**Halilibrahim Ciftci <sup>1,2,3</sup>, Belgin Sever <sup>2,4</sup>, Nilüfer Bayrak <sup>5</sup>, Mahmut Yıldız <sup>6</sup>, Hatice Yıldırım <sup>7</sup>, Hiroshi Tateishi <sup>2</sup>, Masami Otsuka <sup>1,2</sup>, Mikako Fujita <sup>2,\*</sup> and Amaç Fatih TuYuN <sup>5,\*</sup>**

<sup>1</sup> Department of Drug Discovery, Science Farm Ltd., Kumamoto 862-0976, Japan

<sup>2</sup> Medicinal and Biological Chemistry Science Farm Joint Research Laboratory, Faculty of Life Sciences, Kumamoto University, Kumamoto 862-0973, Japan

<sup>3</sup> Department of Molecular Biology and Genetics, Koc University, Istanbul 34450, Turkey

<sup>4</sup> Department of Pharmaceutical Chemistry, Faculty of Pharmacy, Anadolu University, Eskişehir 26470, Turkey

<sup>5</sup> Department of Chemistry, Faculty of Science, Istanbul University, Fatih, Istanbul 34126, Turkey

<sup>6</sup> Chemistry Department, Gebze Technical University, Gebze, Kocaeli 41400, Turkey

<sup>7</sup> Department of Chemistry, Faculty of Engineering, Istanbul University-Cerrahpasa, Avcılar, Istanbul 34320, Turkey

\* Correspondence: mfujita@kumamoto-u.ac.jp (M.F.); aftuyun@istanbul.edu.tr (A.F.T.); Tel.: +81-96-371-4622 (M.F.); +90-212-4400000 (A.F.T.)

One-dose mean graphs of AQ-11, AQ-12, and AQ-15 against different cancer cell lines.

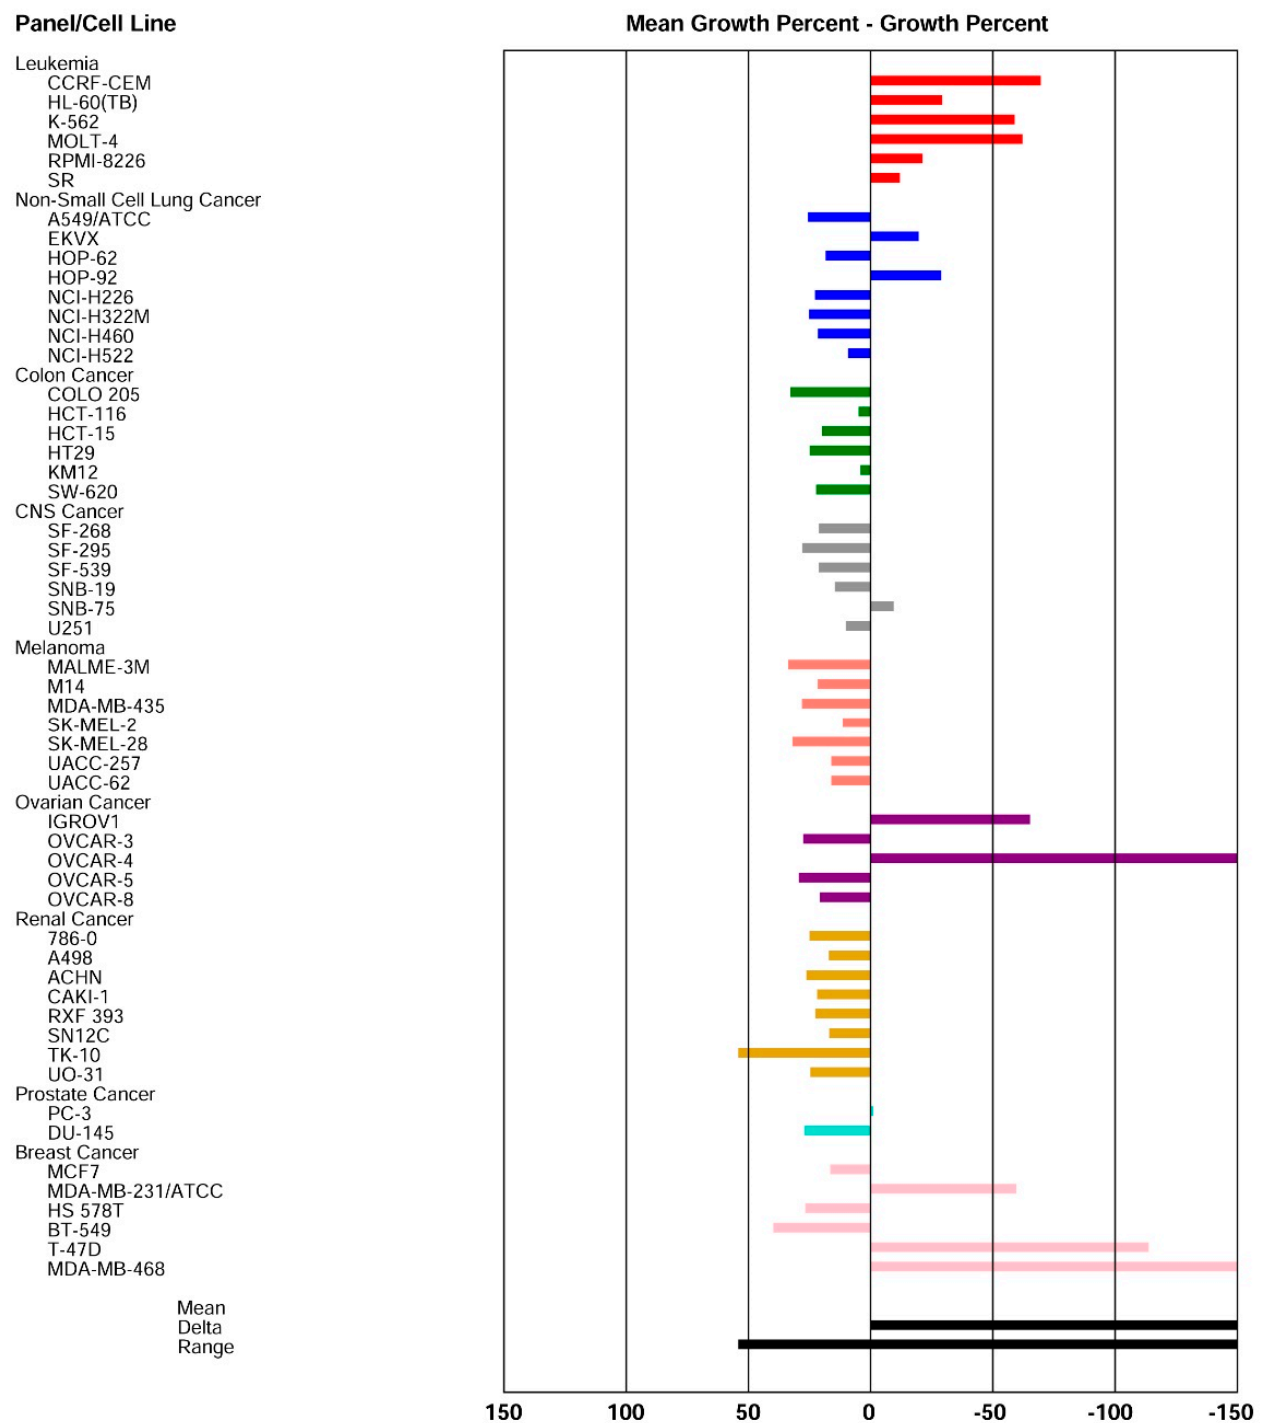

**Figure S1.** One-dose mean graph of **AQ-11** against different cancer cell lines based on Sulforhodamine B (SRB) assay at NCI at 10  $\mu$ M concentration after 48 h.

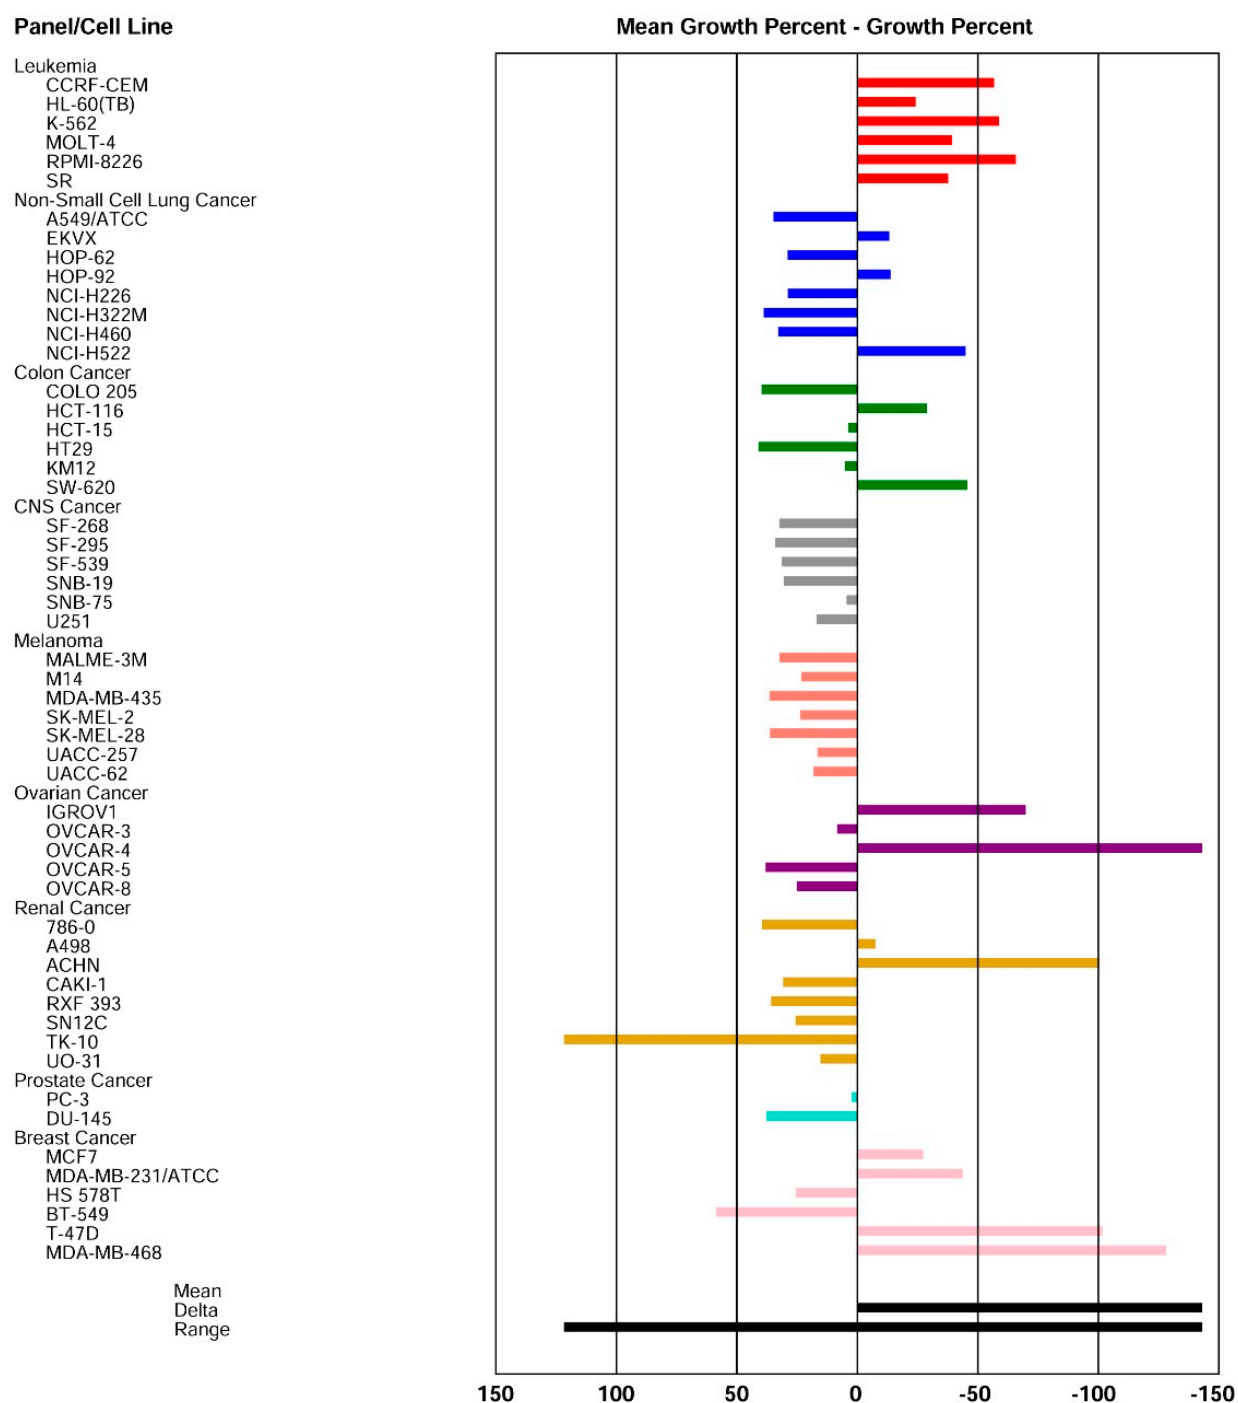

**Figure S2.** One-dose mean graph of AQ-12 against different cancer cell lines based on SRB assay at NCI at 10  $\mu$ M concentration after 48 h.

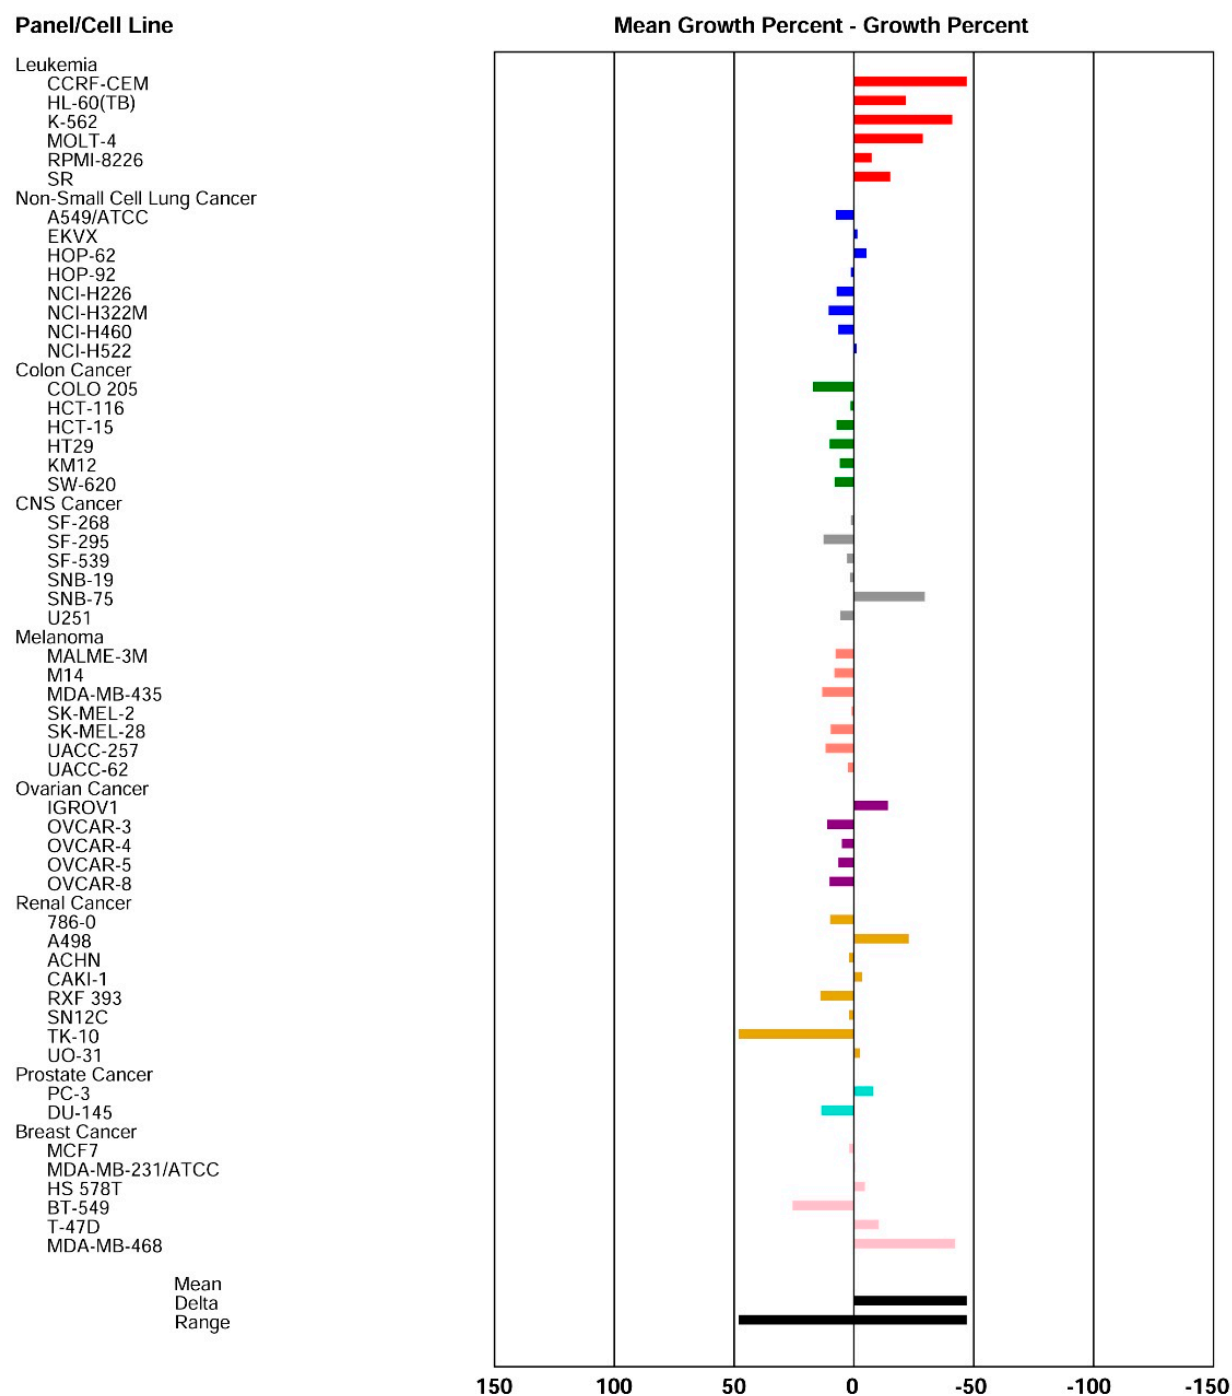

**Figure S3.** One-dose mean graph of **AQ-15** against different cancer cell lines based on SRB assay at NCI at 10  $\mu$ M concentration after 48 h.
